# Supplementary material for: The early and long-term outcomes of coronary artery bypass grafting added to aortic valve replacement compared to isolated aortic valve replacement in elderly patients: a systematic review and meta-analysis
Source: Springer Nature journal article supplement (doi:10.1007/s00380-022-02073-4), 2022-05-09
Supplement: MOESM1 [file 20384994]

## SUPPLEMENTAL MATERIALS

### **The early and long-term outcomes of coronary artery bypass grafting added to aortic valve replacement compared to isolated aortic valve replacement in elderly patients: A systematic review and meta-analysis.**

**Journal: Heart and Vessels**

**Stefano D'Alessandro MD, FECTS<sup>1</sup>, Domenico Tuttolomondo MD<sup>2</sup>, Gurmeet Singh MD<sup>3</sup>, Daniel Hernandez-Vaquero MD<sup>4</sup>, Claudia Pattuzzi MD<sup>5</sup>, Alan Galligani MD<sup>5</sup>, Francesco Maestri MD<sup>5</sup>, Francesco Nicolini MD, PhD <sup>5,6</sup> and Francesco Formica MD\* <sup>5,6</sup>.**

<sup>1</sup> Cardiac Surgery Unit, San Gerardo Hospital, Monza, Italy.

<sup>2</sup> Cardiology Unit, University Hospital of Parma, Italy

<sup>3</sup> Department of Critical Care Medicine and Division of Cardiac Surgery, Mazankowski Alberta Heart Institute, University of Alberta, Canada.

<sup>4</sup> Cardiac Surgery Department, Hospital Universitario Central de Asturias, Oviedo, Spain

<sup>5</sup> Cardiac Surgery Unit, University Hospital of Parma, Italy

<sup>6</sup> Department of Medicine and Surgery, University of Parma

#### **Corresponding Author:**

Prof. Francesco Formica, MD  
*UOC Cardiochirurgia*  
*Azienda Ospedaliera Universitaria di Parma*  
*Via A. Gramsci, 14*  
*43126 Parma, Italy*  
*Tel.: +39 0521703278*  
*E-mail: francescoformica.hs@gmail.com*  
*francesco.formica@unipr.it*

Supplemental Figures

Figure 1. PRISMA flow diagram.....page 3  
Figures 2. Forrest plot for sensitivity analysis.....page 5  
Figures 3. Funnel plot for publication bias.....page 6

## PRISMA 2009 Flow Diagram

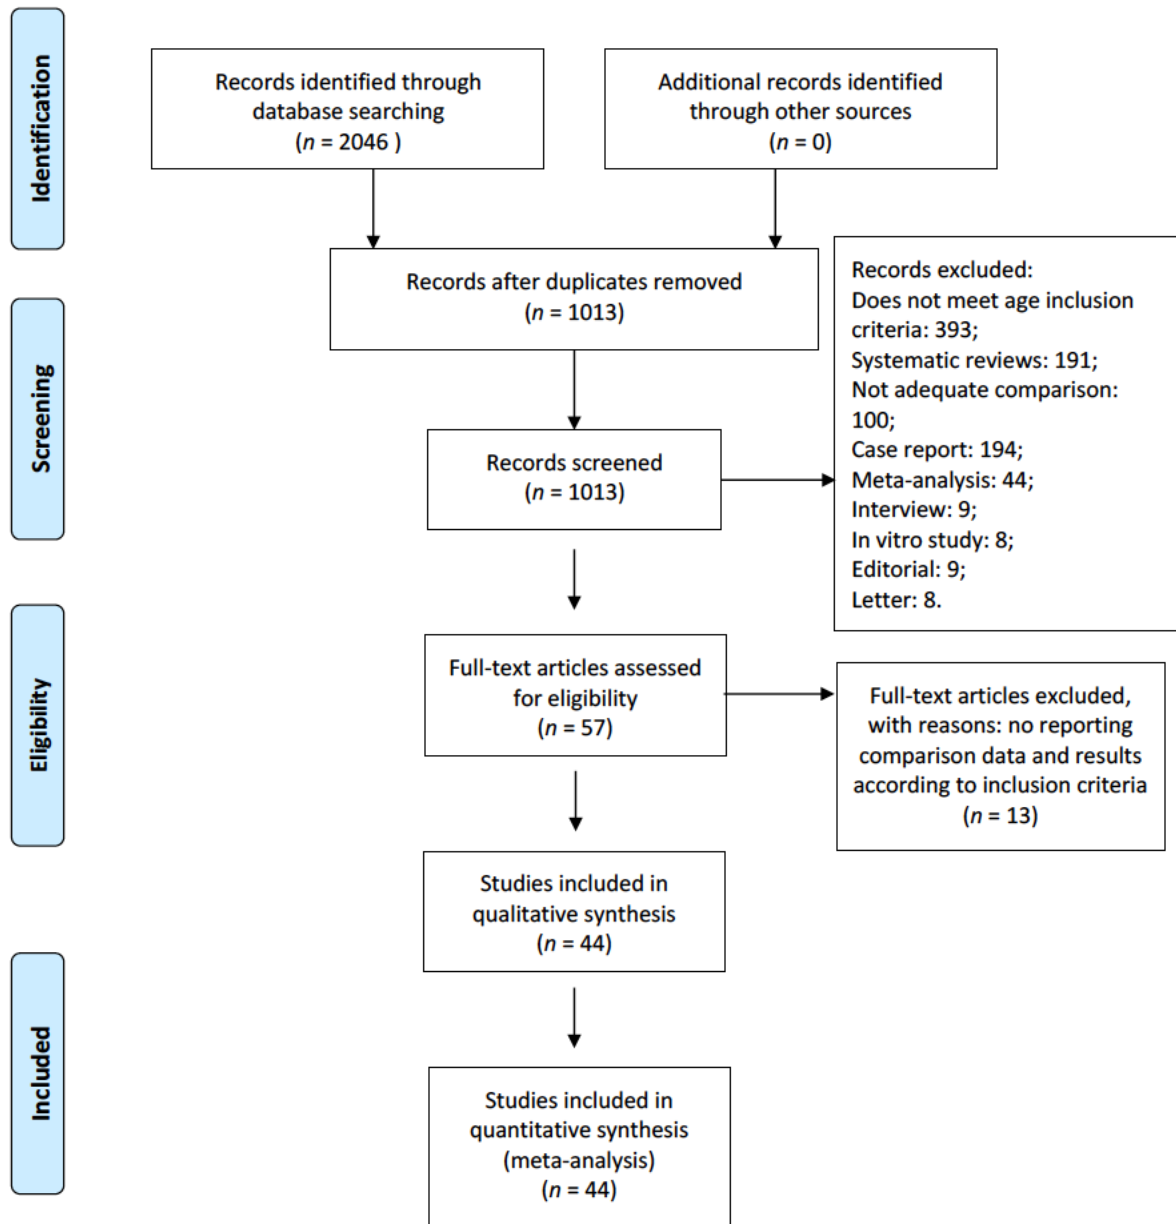

**Figure 1.** Study selection according to the Preferred Reporting Items for Systematic Reviews and Meta-Analyses (PRISMA), presented as a flow diagram.

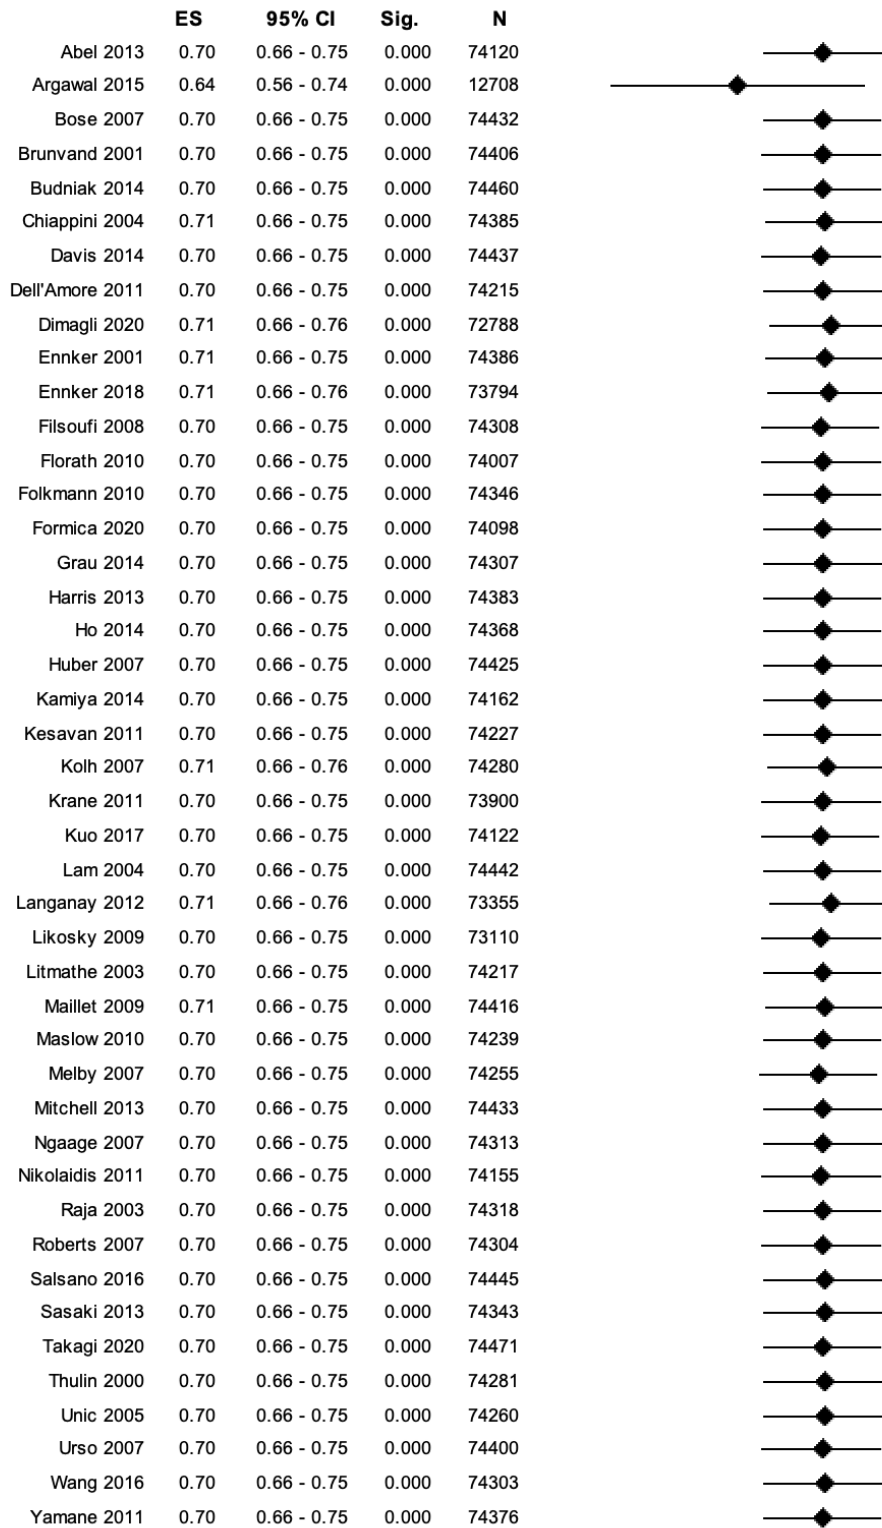

**Figure 2A.** Forest plot of the leave-one-out analysis comparing the early-term effect of coronary artery bypass grafting combined with aortic valve replacement versus isolated aortic valve replacement . *ES: odd ratio.*

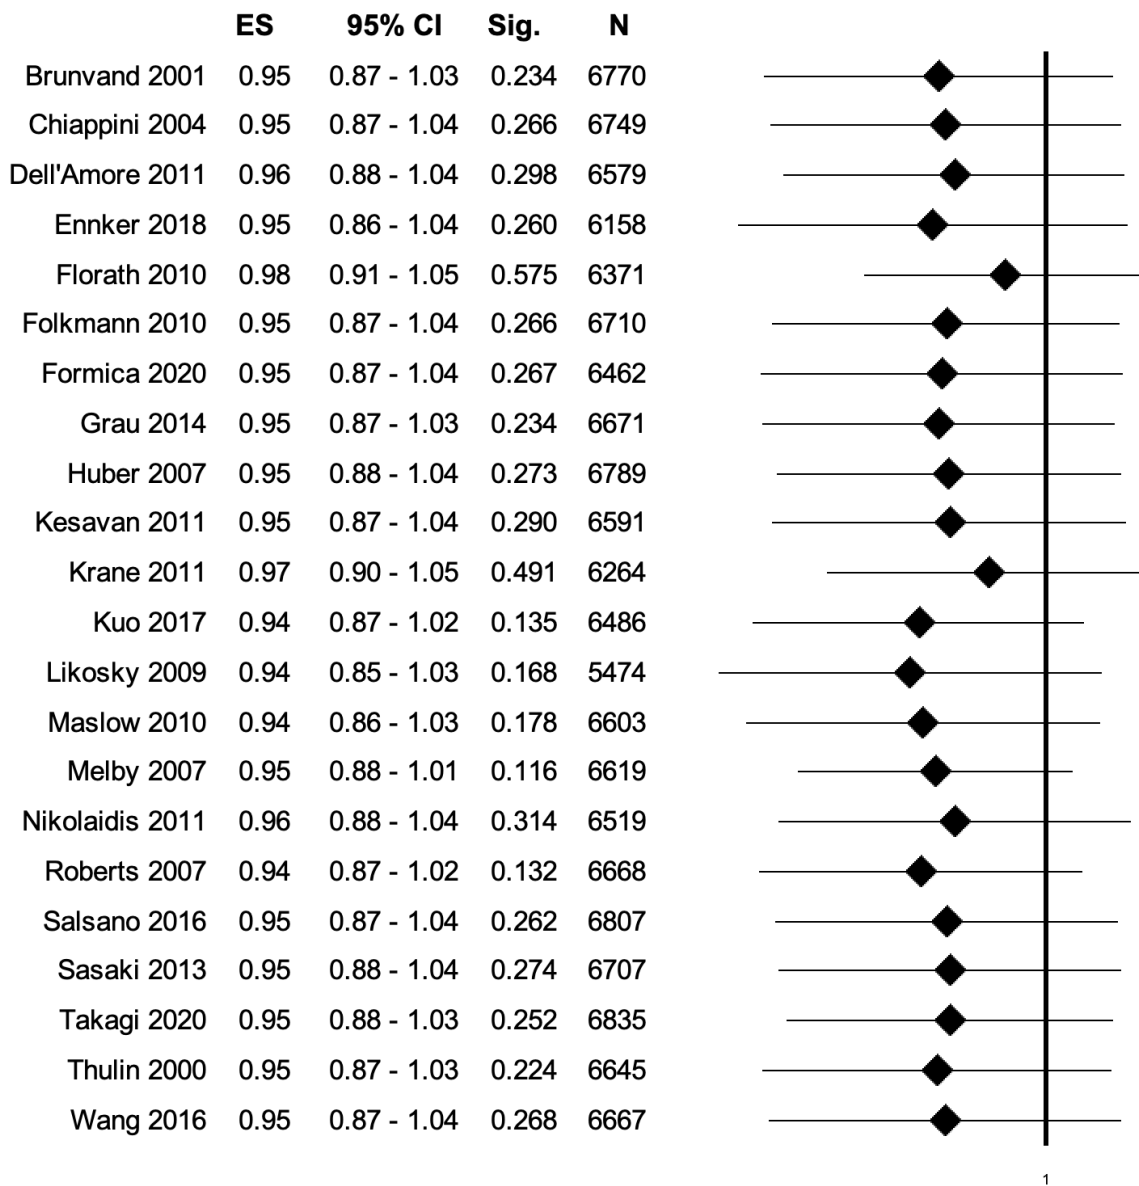

**Figure 2B.** Forest plot of the leave-one-out analysis comparing the long-term effect of coronary artery bypass grafting combined with aortic valve replacement versus isolated aortic valve replacement . *ES: odd ratio.*

**FIGURE 3.**

**Funnel plots for publication bias assesment.**

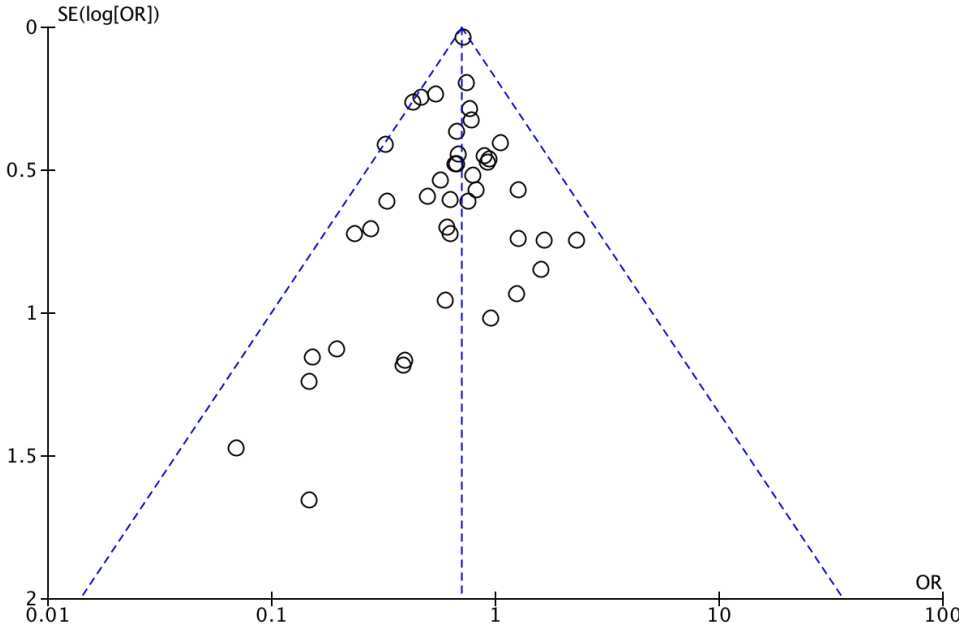

**A.** No publication bias was reported related to the early mortality. Egger’s linear regression test:  $p=0.06$ ; Begg and Mazumdar’s test:  $p=0.15$ .

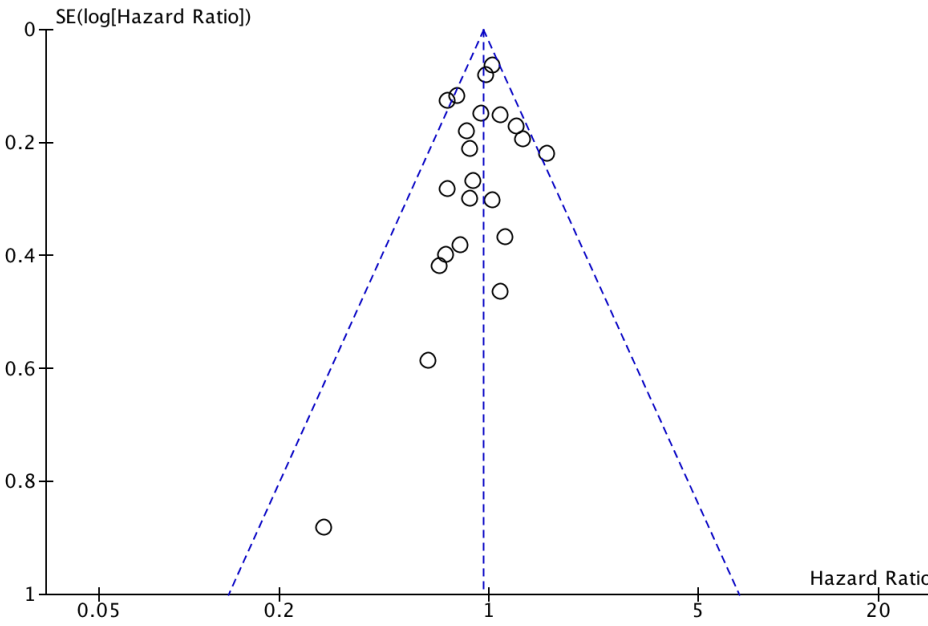

**B.** No publication bias was reported related to the long-term survival. Egger’s linear regression test:  $p = 0.27$ ; Begg and Mazumdar’s linear regression test:  $p = 0.19$ .

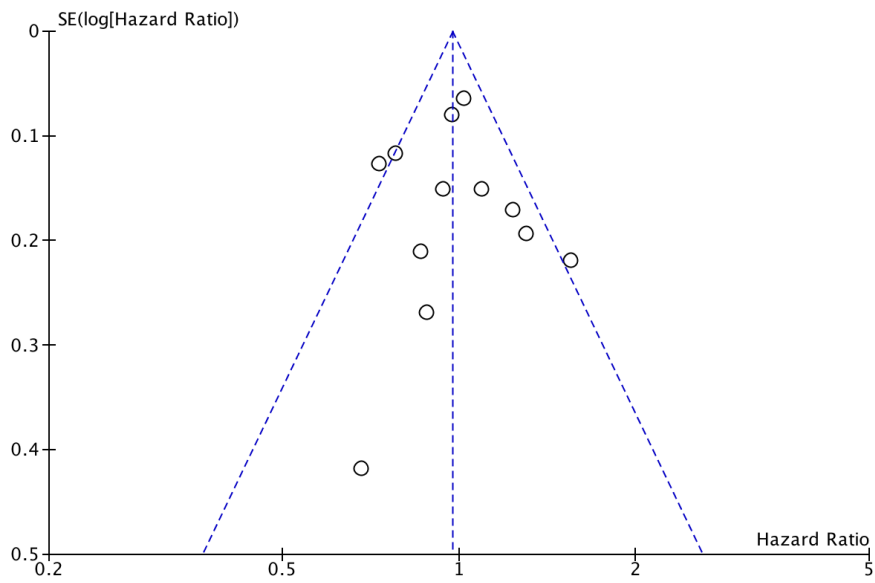

**C.** No publication bias was reported related to long-term survival of studies reporting a maximum follow-up of ten years or more. Egger's linear regression test:  $p=0.83$ ; Begg and Mazumdar's test:  $p=0.90$ .

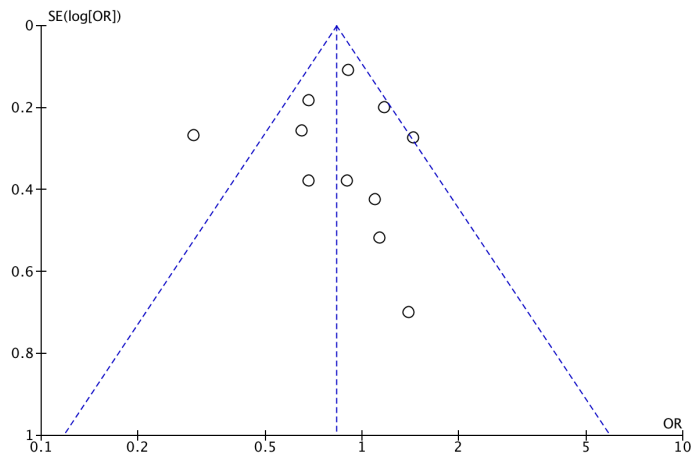

**D.** No publication bias was reported related to postoperative atrial fibrillation. Egger's linear regression test:  $p=0.96$ ; Begg and Mazumdar's test:  $p=0.58$ .

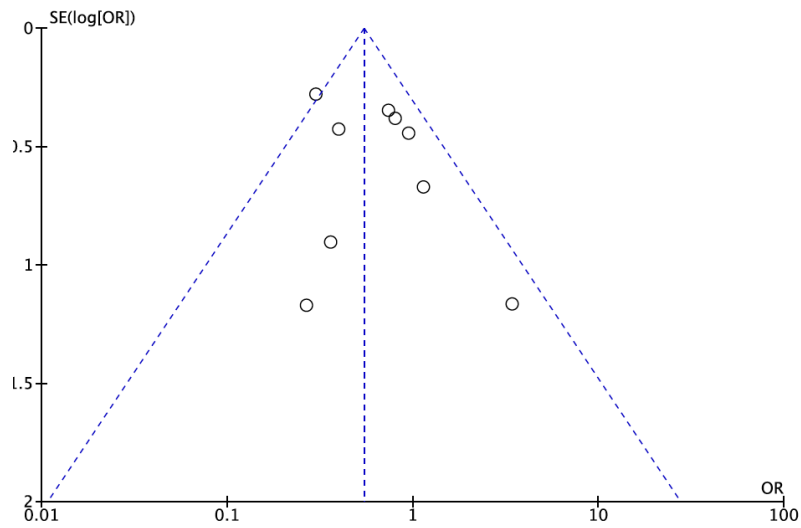

**E.** No publication bias was reported related to postoperative acute renal failure. Egger's linear regression test:  $p=0.33$ ; Begg and Mazumdar's test:  $p=0.29$ .

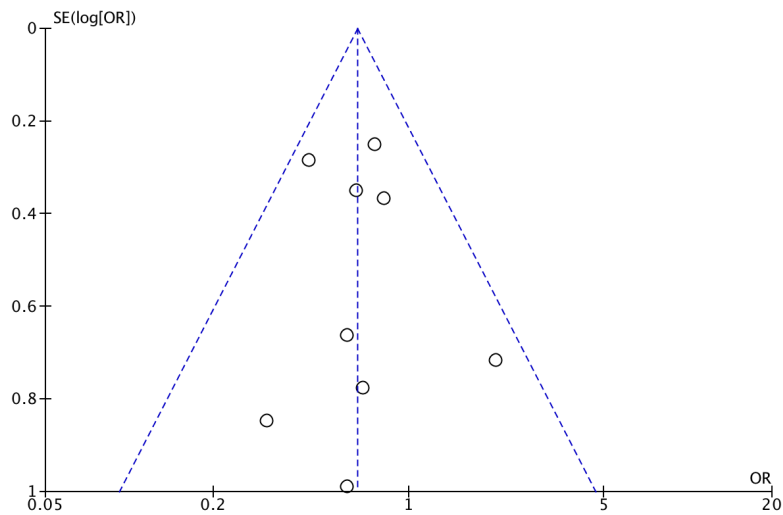

**F.** No publication bias was reported related to need for postoperative dialysis. Egger's linear regression test:  $p = 0.53$ ; Begg and Mazumdar's test:  $p > 0.99$ .



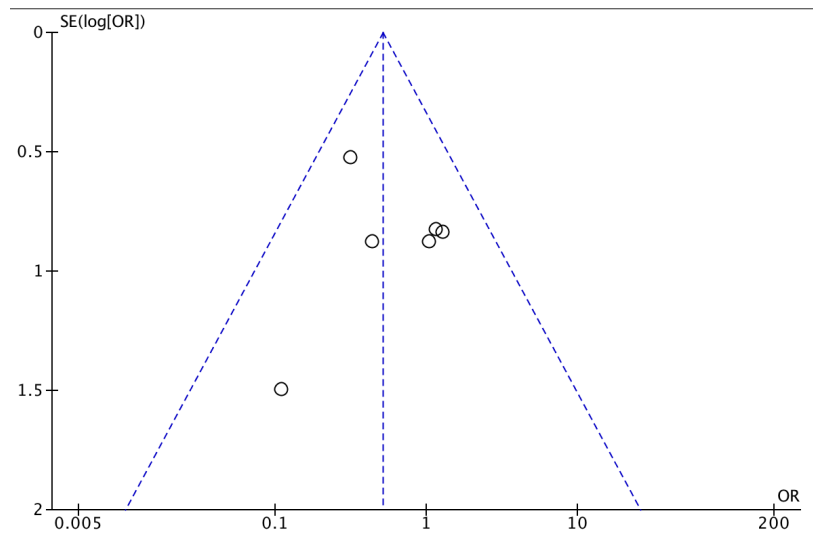

**G.** No publication bias was reported related to postoperative intra-aortic balloon pump usage. Egger’s linear regression test:  $p = 0.67$ ; Begg and Mazumdar’s test:  $p = 0.88$ .

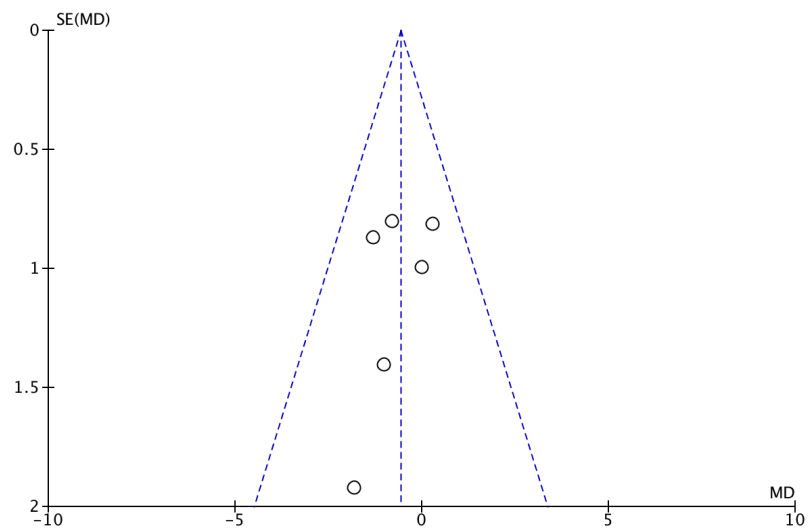

**H.** No publication bias was reported related to length of hospital stay. Egger’s linear regression test:  $p=0.42$ ; Begg and Mazumdar’s test:  $p=0.32$ .

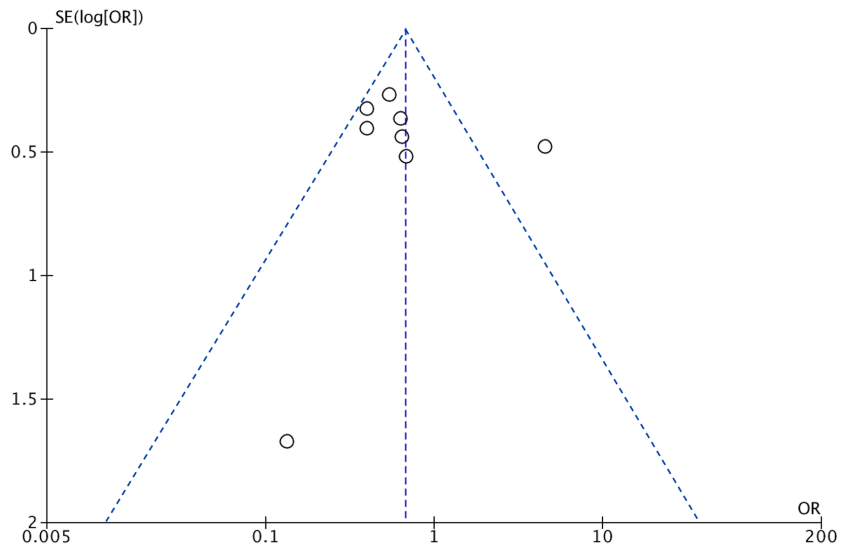

I. No publication bias was reported related to prolonged mechanical ventilation (> 48 hours). Egger's linear regression test:  $p = 0.76$ ; Begg and Mazumdar's test:  $p = 0.21$ .

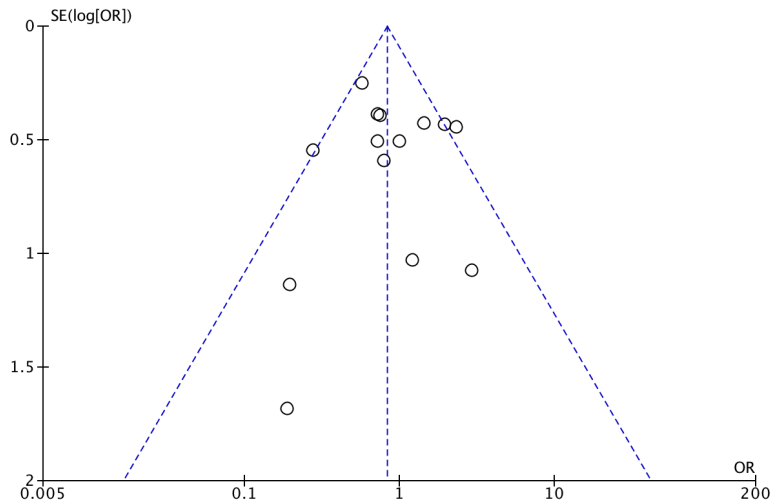

L. No publication bias was reported related to re-thoracotomy for postoperative bleeding/tamponade. Egger's linear regression test:  $p = 0.93$ ; Begg and Mazumdar's test:  $p = 0.89$ .

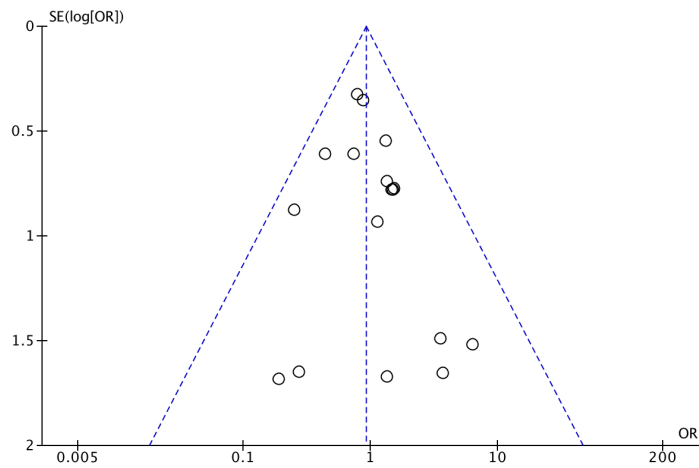

**M.** No publication bias was reported related to postoperative stroke. Egger's linear regression test:  $p=0.89$ ; Begg and Mazumdar's test:  $p=0.78$ .

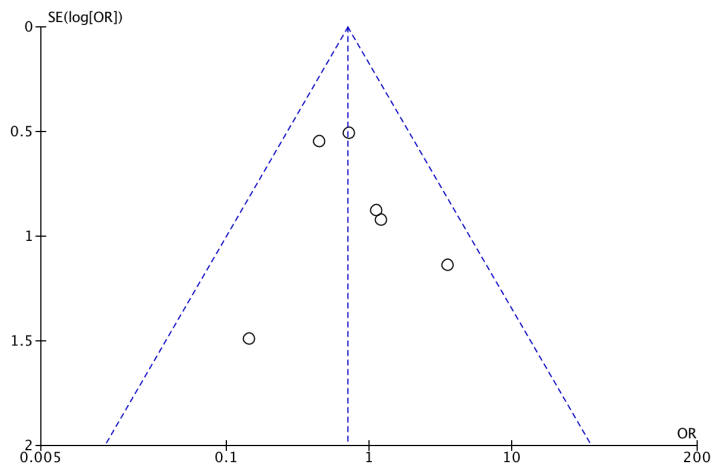

**N.** Funnel plot to assess publication bias. No publication bias was reported related to postoperative pneumonia. Egger's linear regression test:  $p = 0.64$ ; Begg and Mazumdar's test:  $p = 0.57$ .
